# Supplementary material
Source: PubMed Central journal article supplement (PMC3262121)
Supplement: NIHMS341975-supplement-1.pdf [file NIHMS341975-supplement-1.pdf]

## Supplement Material

### **Supplemental Table I. Association of rs13072552 with Serum Cp Levels Stratified by Gender.**

Males

| Stage                     | MAF   | GG                   | GT                  | TT                  | *p-value                 |
|---------------------------|-------|----------------------|---------------------|---------------------|--------------------------|
| Males                     |       |                      |                     |                     |                          |
| GWAS<br>(n = 1880)        | 0.081 | 22 ± 5<br>(n = 1586) | 23 ± 5<br>(n = 283) | 25 ± 7<br>(n = 11)  | 2.25 x 10 <sup>-8</sup>  |
| Replication<br>(n = 1288) | 0.075 | 23 ± 5<br>(n = 1105) | 24 ± 5<br>(n = 173) | 23 ± 10<br>(n = 10) | 0.15                     |
| Combined<br>(n = 3168)    | 0.079 | 22 ± 5<br>(n = 2691) | 23 ± 5<br>(n = 456) | 24 ± 9<br>(n = 21)  | 2.92 x 10 <sup>-07</sup> |
| Females                   |       |                      |                     |                     |                          |
| GWAS<br>(n = 767)         | 0.083 | 27 ± 6<br>(n = 648)  | 30 ± 7<br>(n = 110) | 32 ± 9<br>(n = 9)   | 1.72 x 10 <sup>-5</sup>  |
| Replication<br>(n = 762)  | 0.063 | 28 ± 6<br>(n = 669)  | 29 ± 6<br>(n = 90)  | 28 ± 4<br>(n = 3)   | 4.84 x 10 <sup>-02</sup> |
| Combined<br>(n = 1529)    | 0.073 | 28 ± 6<br>(n = 1317) | 30 ± 7<br>(n = 200) | 31 ± 8<br>(n = 12)  | 7.36 x 10 <sup>-6</sup>  |

Mean serum Cp levels as a function of genotype for rs13072552. Minor allele frequency (MAF).

\*p-values obtained using log transformed Cp values and after adjustment for age.
